# Supplementary material for: TiO2–Fe2O3 nanocomposites as high-capacity negative electrode materials for rechargeable sodium-ion batteries
Source: Royal Society of Chemistry journal article supplement (doi:10.1039/c6se00024j), 2017-01-01
Supplement: c6se00024j1.pdf [file c6se00024j1.pdf]

## Supporting Information

### **TiO<sub>2</sub>-Fe<sub>2</sub>O<sub>3</sub> nanocomposites as high-capacity negative electrode materials for rechargeable sodium-ion batteries**

C.S. Ding,<sup>a</sup> T. Nohira<sup>b,\*</sup> and R. Hagiwara<sup>a,\*</sup>

<sup>a</sup> Graduate School of Energy Science, Kyoto University, Sakyo-ku, Kyoto 606-8501, Japan.

<sup>b</sup> Institute of Advanced Energy, Kyoto University, Uji 611-0011, Japan.

**(a)**

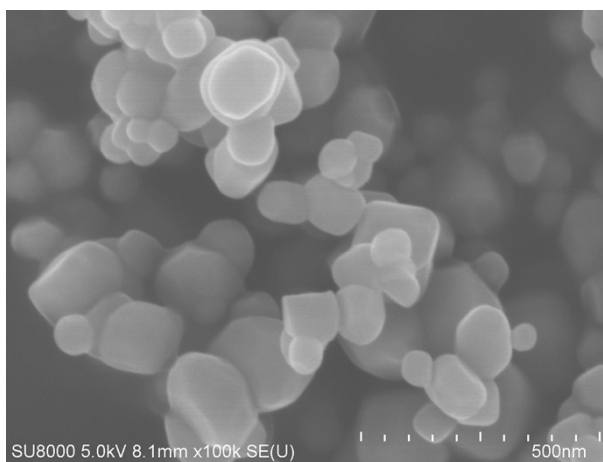

**(b)**

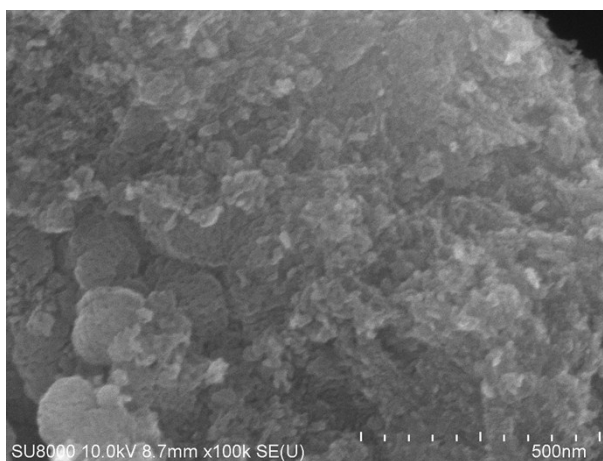

Figure S1. SEM images of (a) commercially available anatase TiO<sub>2</sub> nanopowders and (b) synthesized Fe<sub>2</sub>O<sub>3</sub> nanopowders.

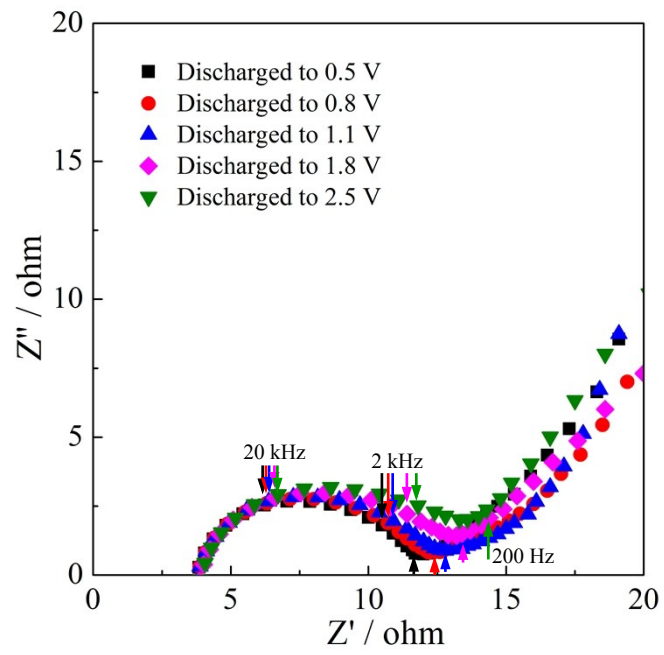

Figure S2. Nyquist plots for the  $\text{TiO}_2\text{-Fe}_2\text{O}_3\text{-30}$  electrode at different discharge states.

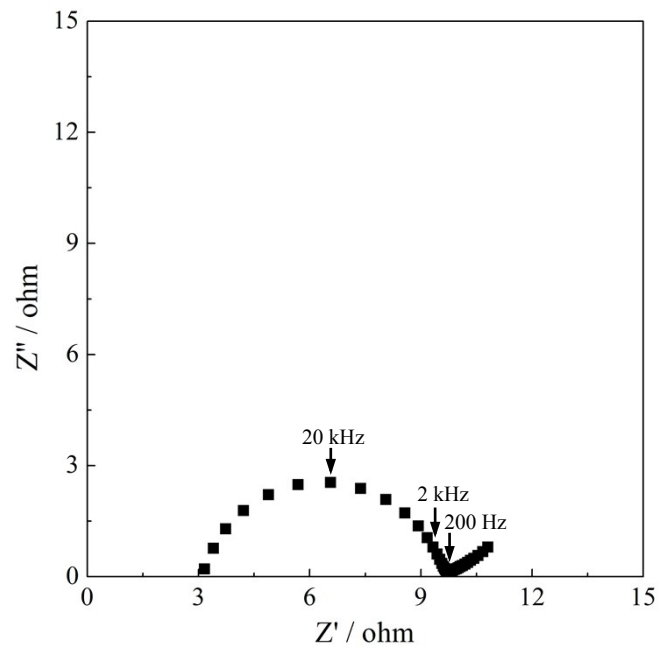

Figure S3. Nyquist plot for a Na/Na[FSA]-[C<sub>3</sub>C<sub>1</sub>pyrr][FSA]/Na symmetric cell.
